# Supplementary material for: Magnetic Bi25FeO40-graphene catalyst and its high visible-light photocatalytic performance
Source: Royal Society of Chemistry journal article supplement (doi:10.1039/c3ra22626c), 2013-01-01
Supplement: c3ra22626c.pdf [file c3ra22626c.pdf]

Table 1S: XPS data of C1s of Bi<sub>25</sub>FeO<sub>40</sub>-(20) graphene catalyst, including binding energies and area percentages relative to C-C bonds in parentheses.

| Samples                                    | C-C          | C-OH         | C-O-C        | HO-C=O       |
|--------------------------------------------|--------------|--------------|--------------|--------------|
| GO[1]                                      | 284.86 (100) | 286.19 (28)  | 287.57 (59)  | 289.24 (11)  |
| Bi <sub>25</sub> FeO <sub>40</sub> -(20)RG | 284.50 (100) | 286.48 (2.1) | 287.59 (9.3) | 289.30 (9.5) |

#### References

- [1] C. Xu, X. Wang, J. Zhu, J. Phys. Chem. C 112 (2008) 19841-19845.

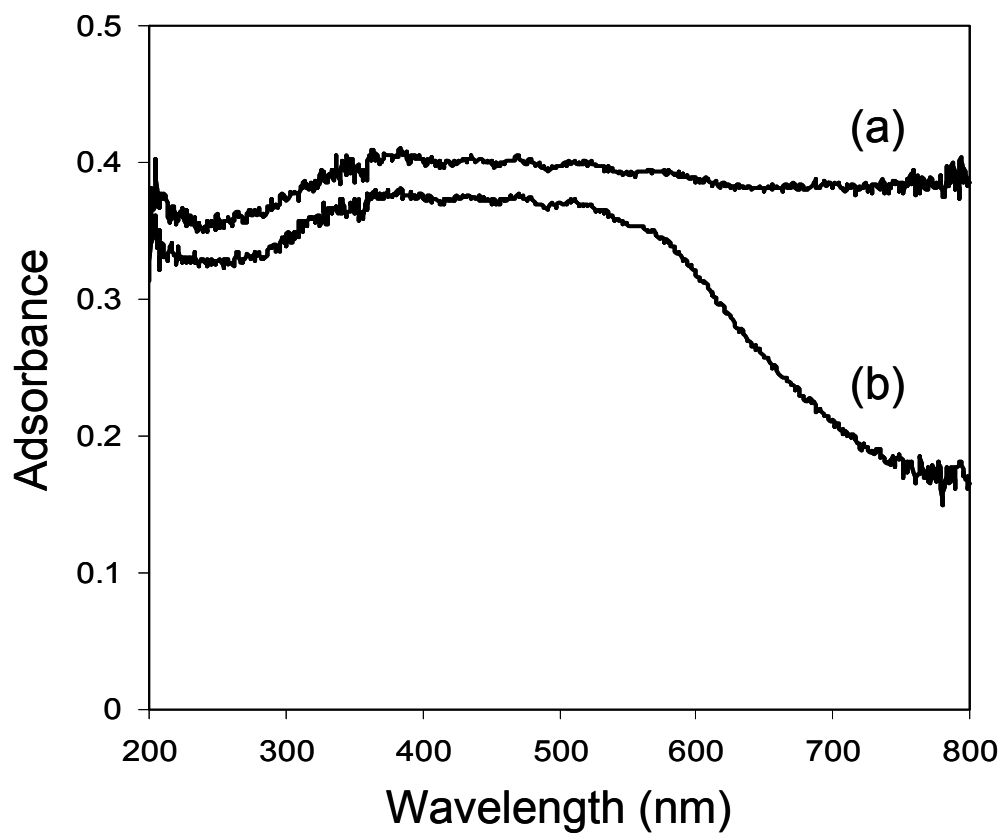

**Figure 1S.** UV-vis diffuse reflectance spectra of (a)  $\text{Bi}_{25}\text{FeO}_{40}$ -(20) graphene and (b) pure  $\text{Bi}_{25}\text{FeO}_{40}$ .

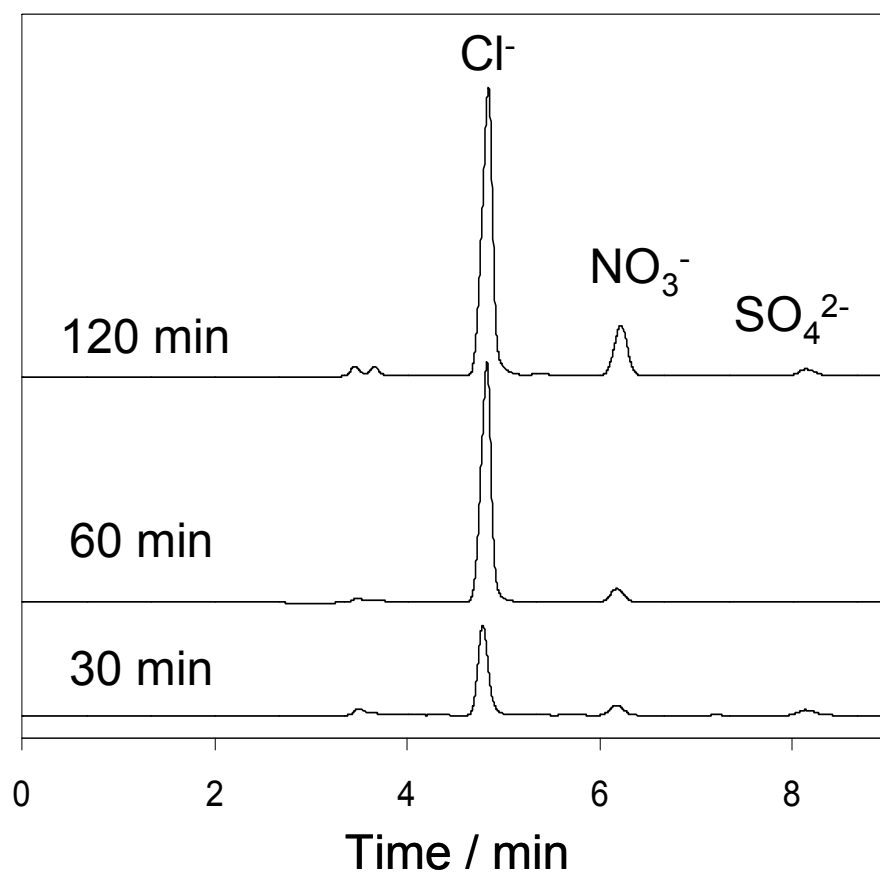

**Figure 2S.** IC chromatograms of the production of MB solutions photodegraded at different time by the  $\text{Bi}_{25}\text{FeO}_{40}$ -(20) graphene photocatalyst. (The amount of  $\text{Cl}^-$  is  $0.03$ ,  $1.10$  and  $1.73 \text{ mg L}^{-1}$  at irradiation time of 30, 60 and 120 min, respectively.)
